# Supplementary material for: Unilateral Tamoxifen-Induced Retinopathy as a Consequence of Breast Cancer Treatment—Multimodal Imaging Value
Source: MDPI journal article supplement (doi:10.3390/diagnostics13071250), 2023-03-27
Supplement: s1 [file s1]

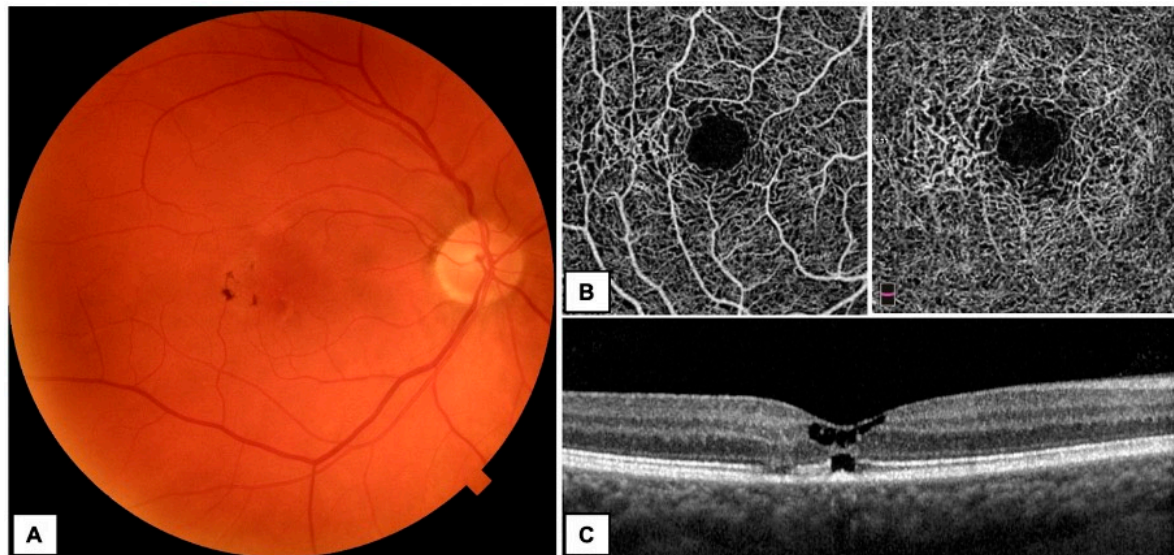

**Figure S1.** Mac Tel 2 of the RE (A) Color fundus photography–parafoveal loss of retinal transparency with RPE plaques temporal to the fovea. (B) OCTA–telangiectatic and distorted vessels both in the deep and superficial capillary plexuses mainly located temporal to the fovea (C) OCT B-scan shows intraretinal cavities in the inner retinal layers, disruption of the photoreceptors integrity in the center and temporal to the fovea.
